# Supplementary material
Source: bioRxiv or medRxiv preprint supplement (https://www.biorxiv.org/highwire/filestream/43175/field_highwire_adjunct_files/3/087247-4.pdf)

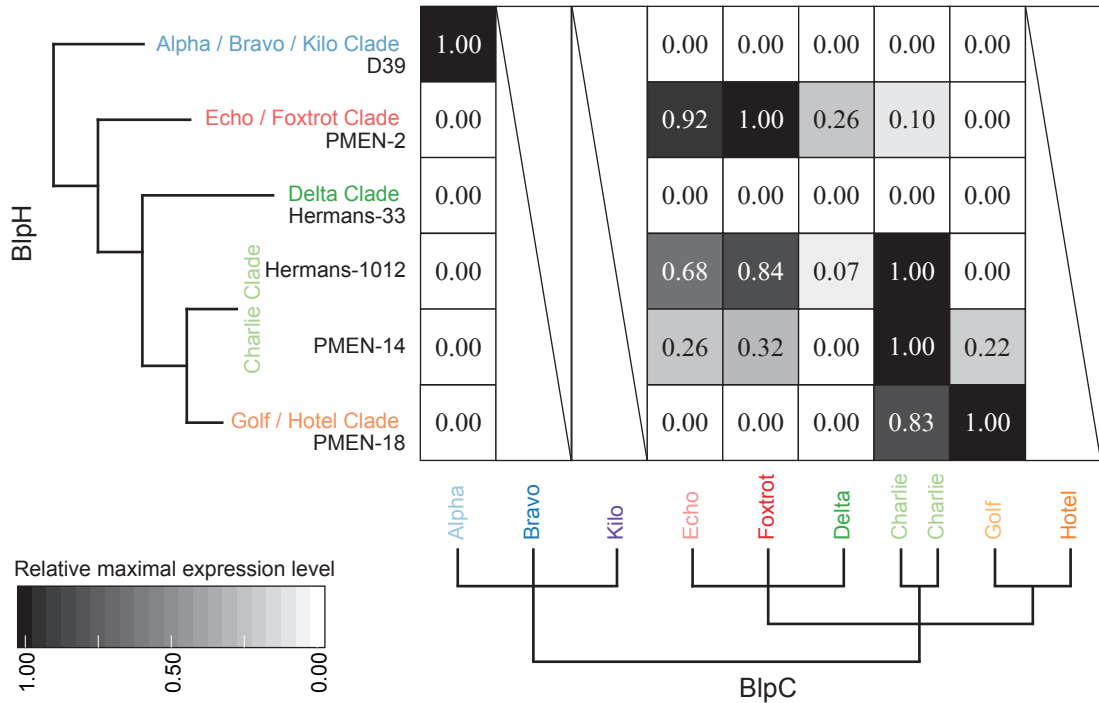

Supplement: Supplementary file [file 087247-4.pdf]
